# Supplementary material for: Can Moderate Heavy Metal Soil Contaminations Due To Cement Production Influence The Surrounding Soil Bacterial Communities?
Source: Research Square preprint supplement (doi:10.21203/rs.3.rs-551670/v1), 2021-06-08
Supplement: Supplementary file 1 [file 9ff5c6f4900b763ccecb460c.docx]

Table S1. PERMANOVA p-value tests for pairwise comparisions between β-diversity dissimilarity matrices estimated for the sampled cement plant surroundings (CPS)

| **Pairwise comparison** | **Bray-Curtis** | **Unifrac Unweighted** | **Unifrac Weighted** |
| --- | --- | --- | --- |
| **CPS 1 *vs.* CPS 2** | 0.326 | 0.239 | 0.460 |
| **CPS 1 *vs.* CPS 3** | 0.140 | 0.397 | 0.570 |
| **CPS 2 *vs.* CPS 3** | 0.445 | 0.538 | 0.605 |

Table S2. PERMANOVA p-value tests for pairwise comparisions between β-diversity dissimilarity matrices from CPS samples with or without forest cover.

| **Forest cover** | **Bray-Curtis** | **Unifrac Unweighted** | **Unifrac Weighted** |
| --- | --- | --- | --- |
| **Present vs. Absent** | 0.818 | 0.173 | 0.570 |

Table S3. Shannon diversity index comparisons (CPS vs. Control samples) for Level 2 KEGG Pathway categories

| **Metabolic category** | **Shannon diversity index** | | |
| --- | --- | --- | --- |
| **CPS** | **Control** | **Kruskal-wallis p-value** |
| Global | 9.46 | 9.45 | 0.321 |
| Aminoacid | 6.60 | 7.09 | 0.364 |
| **Carbohydrate** | **7.29** | **7.19** | **0.05** |
| Cofactors | 6.40 | 6.53 | 0.321 |
| Cell Community | 4.54 | 4.42 | 0.137 |
| **Cell cycle** | **3.04** | **3.10** | **0.04** |
| Drug resistance | 2.91 | 2.90 | 0.283 |
| Energy | 5.91 | 5.84 | 0.363 |
| Folding, sorting and degradation | 4.14 | 4.14 | 0.868 |
| Glycan | 5.13 | 4.92 | 0.083 |
| Lipid | 4.55 | 4.45 | 0.069 |
| Membrane transport | 5.90 | 5.83 | 0.283 |
| Motility | 4.36 | 4.14 | 0.934 |
| Nucleotide | 5.97 | 5.90 | 0.137 |
| Replication and repair | 5.42 | 5.38 | 0.099 |
| Secondary metabolites | 5.61 | 5.56 | 0.137 |
| **Signal transduction** | **5.41** | **5.20** | **0.026** |
| Terpenoid | 3.91 | 3.87 | 0.934 |
| Translation | 6.26 | 6.24 | 0.620 |
| Xenobiotics degradation | 3.32 | 3.04 | 0.069 |
